# Supplementary material
Source: PubMed Central journal article supplement (PMC1184555)

**Supplementary figures :**

**Figure 1.** A431 cells treated with solvent alone (DMSO) or 30 µg/ml calpeptin for 3 hours were fixed and labelled for RCP (green) and the plasma membrane marker ZO-1 (red) or Tfn receptor (red). Bar, 10 µm.

**Figure 2.** A431 cells were pretreated with solvent alone (DMSO) or 30 µg/ml calpeptin for 3 hours then labelled with Alexa 594-Tfn for 45 min in the presence or absence of calpeptin (Uptake, DMSO or Calpeptin 30 µg/ml). After the uptake, labelled Tfn was chased for 30 min in the presence of an excess of unlabelled ligand in the presence or not of calpeptin (Chase, DMSO or Calpeptin 30 µg/ml).

Figure 1

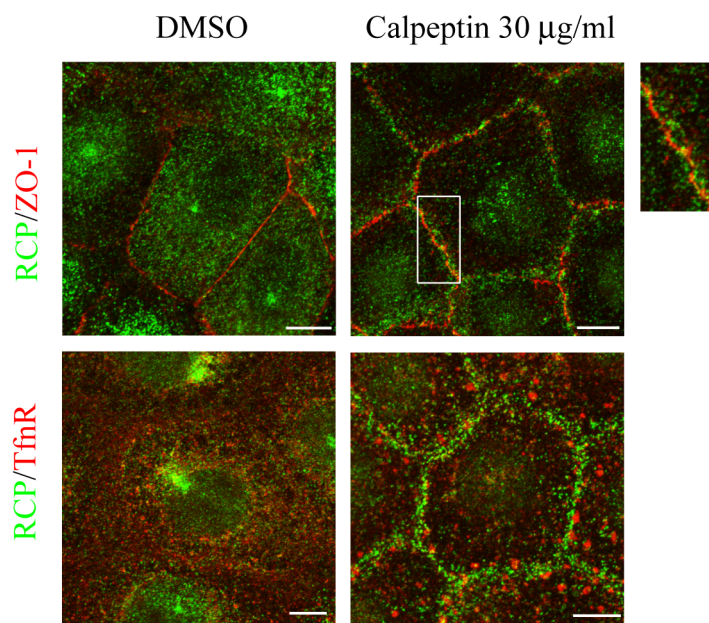

Figure 2

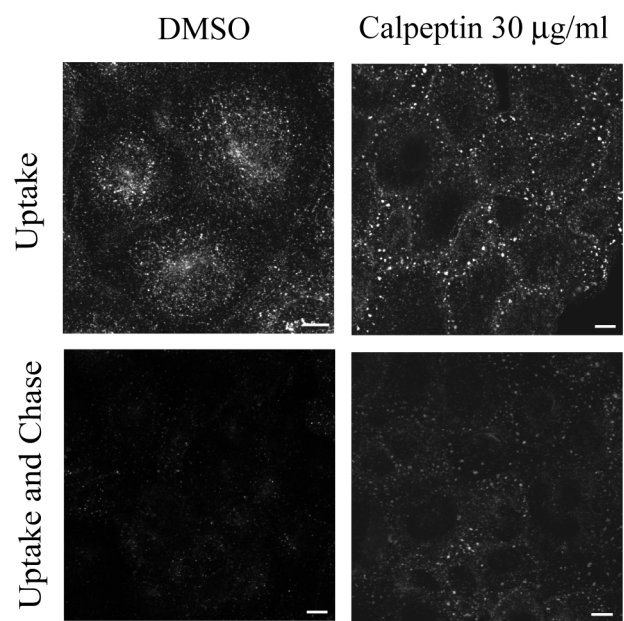

Supplement: bj3890223add.pdf [file bj3890223add.pdf]
